# Supplementary material for: Vaccine targeting ANGPTL3 ameliorates dyslipidemia and associated diseases in mouse models of obese dyslipidemia and familial hypercholesterolemia
Source: PubMed Central journal article supplement — Cell Rep Med. 2021 Nov 16;2(11):100446. doi: 10.1016/j.xcrm.2021.100446 (PMC8606905; doi:10.1016/j.xcrm.2021.100446), 2021-11-16
Supplement: mmc1.pdf [file mmc1.pdf]

**Cell Reports Medicine, Volume 2**

**Supplemental information**

**Vaccine targeting ANGPTL3 ameliorates dyslipidemia  
and associated diseases in mouse models of obese  
dyslipidemia and familial hypercholesterolemia**

**Hiroataka Fukami, Jun Morinaga, Hironori Nakagami, Hiroki Hayashi, Yusuke Okadome, Eiji Matsunaga, Tsuyoshi Kadomatsu, Haruki Horiguchi, Michio Sato, Taichi Sugizaki, Takashige Kuwabara, Keishi Miyata, Masashi Mukoyama, Ryuichi Morishita, and Yuichi Oike**

1 **Supplementary information**

2

3 Vaccine targeting ANGPTL3 ameliorates dyslipidemia and associated diseases in mouse models of obese  
4 dyslipidemia and familial hypercholesterolemia

5

6

7 Hiroataka Fukami, Jun Morinaga, Hironori Nakagami, Hiroki Hayashi, Yusuke Okadome, Eiji Matsunaga,  
8 Tsuyoshi Kadomatsu, Haruki Horiguchi, Michio Sato, Taichi Sugizaki, Takashige Kuwabara, Keishi  
9 Miyata, Masashi Mukoyama, Ryuichi Morishita, Yuichi Oike

10

11

1 **Supplementary tables**

2

3

4

5

6

7

8

9 Table S1. Amino acid sequences of peptides E1–E3. Related to Figure 1.

10

| Peptide | Amino acid sequence                      |
|---------|------------------------------------------|
| E1      | <sup>17</sup> SRVDPDLSS <sup>25</sup>    |
| E2      | <sup>416</sup> KYNKPRTKSR <sup>425</sup> |
| E3      | <sup>32</sup> EPKSRFAMLD <sup>41</sup>   |

| Gene           | Forward (5'-3')           | Reverse (5'-3')            |
|----------------|---------------------------|----------------------------|
| <i>Rps18</i>   | TTCTGGCCAACGGTCTAGACAAC   | CCAGTGGTCTTGGTGTGCTGA      |
| <i>Angptl3</i> | GATTTGCTATGTTGGATGATGTCAA | CTTATGGACAAAATCTTTAAGTCCA  |
| <i>Acc1</i>    | ACAGTGGAGCTAGAATTGGAC     | ACTTCCCGACCAAGGACTTTG      |
| <i>Fasn</i>    | AGCACTGCCTTCGGTTCAGTC     | AAGAGCTGTGGAGGCCACTTG      |
| <i>Il-6</i>    | CCACTTCACAAGTCGGAGGCTTA   | GCAAGTGCATCATCGTTGTTTCATAC |
| <i>Tnf</i>     | AAGCCTGTAGCCACGTCGTA      | GGCACCACTAGTTGGTTGTCTTTG   |
| <i>Colla1</i>  | GAGCGGAGAGTACTGGATCGA     | CTGACCTGTCTCCATGTTGCA      |
| <i>Col3a1</i>  | CAACCAGTGCAAGTGACCAA      | GCACCATTGAGACATTTTGAAG     |

1

2 Table S2. Sequences of primers used for quantitative RT-PCR of mouse genes. Related to Oligonucleotides  
3 in Star Methods.

4

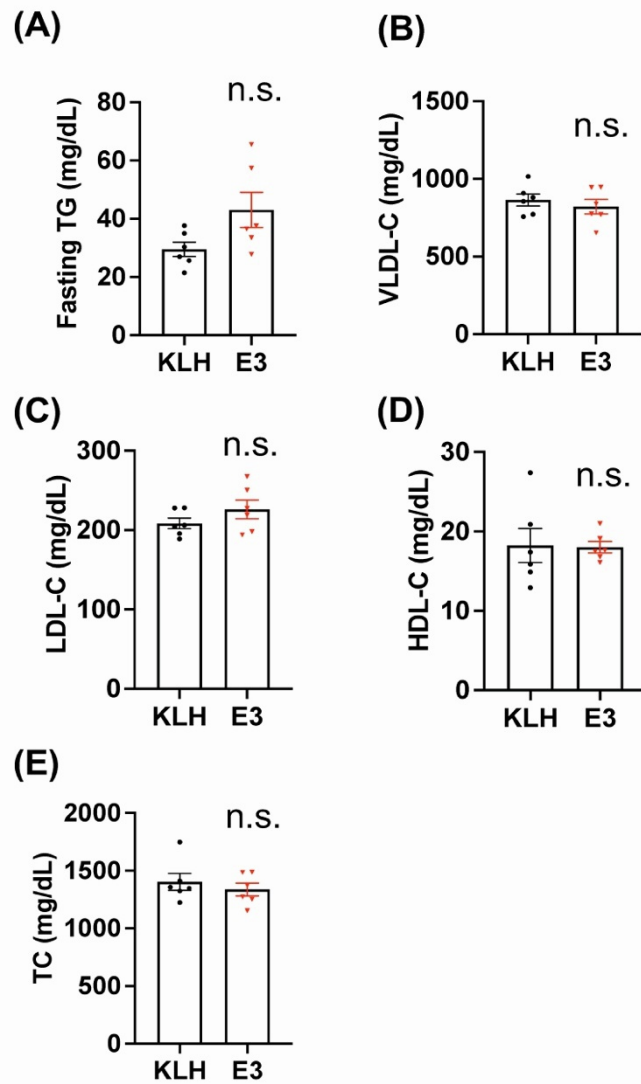

1  
 2 Figure S1. Evaluation of long-term efficacy of the E3 vaccine against dyslipidemia in severe familial  
 3 hypercholesterolemia model mice. (A-E) Blood samples from *ApoE<sup>shl</sup>* mice fed a high cholesterol  
 4 diet were analyzed 22 weeks after the first immunization (n=6 per group). Levels of (A) fasting TG, (B)  
 5 fasting VLDL-C, (C) fasting LDL-C, (D) fasting HDL-C, and (E) fasting TC in circulation. Results are  
 6 expressed as mean  $\pm$  SEM. n.s. not significant. Related to Figure 5.
